# Supplementary material
Source: PubMed Central journal article supplement (PMC8117772)
Supplement: AEM.03037-20-s0001.pdf [file AEM.03037-20-s0001.pdf]

## Supplementary A

Table 1 List of isolates included in the phylogenetic analysis and their associated study.

| ID  | Host Species | Study |
|-----|--------------|-------|
| AAA | Chicken      | 1     |
| AAC | Chicken      | 1     |
| AAD | Chicken      | 1     |
| AAE | Chicken      | 1     |
| AAF | Chicken      | 1     |
| AAG | Chicken      | 1     |
| AAJ | Chicken      | 1     |
| AAL | Chicken      | 1     |
| BAG | Chicken      | 1     |
| CAA | Chicken      | 1     |
| CAC | Chicken      | 1     |
| CAD | Chicken      | 1     |
| CAE | Chicken      | 1     |
| CAI | Chicken      | 1     |
| CAM | Chicken      | 1     |
| DAE | Chicken      | 1     |
| DAG | Chicken      | 1     |
| DAH | Chicken      | 1     |
| DAS | Chicken      | 1     |
| DAW | Chicken      | 1     |
| DBB | Chicken      | 1     |
| DCA | Chicken      | 1     |
| DCE | Chicken      | 1     |
| DCF | Chicken      | 1     |
| DCG | Chicken      | 1     |
| DCI | Chicken      | 1     |
| DDE | Chicken      | 1     |
| DED | Chicken      | 1     |
| DEG | Chicken      | 1     |
| DEH | Chicken      | 1     |
| DEI | Chicken      | 1     |
| DEL | Chicken      | 1     |
| DEQ | Chicken      | 1     |
| DER | Chicken      | 1     |
| DFD | Chicken      | 1     |
| DES | Chicken      | 1     |

|             |         |   |
|-------------|---------|---|
| FAA         | Chicken | 1 |
| FAB         | Chicken | 1 |
| FAF         | Chicken | 1 |
| GAA         | Chicken | 1 |
| GAD         | Chicken | 1 |
| GBA         | Chicken | 1 |
| GBB         | Chicken | 1 |
| GBG         | Chicken | 1 |
| GCE         | Chicken | 1 |
| GCG         | Chicken | 1 |
| GDA         | Chicken | 1 |
| GDF         | Chicken | 1 |
| GDG         | Chicken | 1 |
| GEA         | Chicken | 1 |
| GED         | Chicken | 1 |
| GEL         | Chicken | 1 |
| GEM         | Chicken | 1 |
| GEN         | Chicken | 1 |
| GFA         | Chicken | 1 |
| GFD         | Chicken | 1 |
| GFG         | Chicken | 1 |
| GGH         | Chicken | 1 |
| GGI         | Chicken | 1 |
| GGL         | Chicken | 1 |
| GGO         | Chicken | 1 |
| GHA         | Chicken | 1 |
| GHC         | Chicken | 1 |
| GHD         | Chicken | 1 |
| EAJ         | Chicken | 1 |
| E20010_2017 | Human   | 2 |
| E20101_2016 | Human   | 2 |
| E20102_2016 | Human   | 2 |
| E20102_2017 | Human   | 2 |
| E20103_2017 | Human   | 2 |
| E20104_2015 | Human   | 2 |
| E20104_2016 | Human   | 2 |
| E20104_2017 | Human   | 2 |
| E20105_2015 | Human   | 2 |
| E20105_2016 | Human   | 2 |
| E20105_2017 | Human   | 2 |

|             |       |   |
|-------------|-------|---|
| E20106_2015 | Human | 2 |
| E20106_2016 | Human | 2 |
| E20107_2016 | Human | 2 |
| E20108_2016 | Human | 2 |
| E20109_2016 | Human | 2 |
| E20109_2017 | Human | 2 |
| E20110_2015 | Human | 2 |
| E20110_2016 | Human | 2 |
| E20111_2016 | Human | 2 |
| E20111_2017 | Human | 2 |
| E20112_2016 | Human | 2 |
| E20112_2017 | Human | 2 |
| E20113_2017 | Human | 2 |
| E20114_2016 | Human | 2 |
| E20114_2017 | Human | 2 |
| E20115_2016 | Human | 2 |
| E20115_2017 | Human | 2 |
| E20116_2016 | Human | 2 |
| E20116_2017 | Human | 2 |
| E20117_2016 | Human | 2 |
| E20117_2017 | Human | 2 |
| E20118_2016 | Human | 2 |
| E20118_2017 | Human | 2 |
| E20119_2015 | Human | 2 |
| E20119_2017 | Human | 2 |
| E20120_2015 | Human | 2 |
| E20120_2016 | Human | 2 |
| E20120_2017 | Human | 2 |
| E20121_2015 | Human | 2 |
| E20121_2016 | Human | 2 |
| E20121_2017 | Human | 2 |
| E20122_2015 | Human | 2 |
| E20122_2017 | Human | 2 |
| E20123_2016 | Human | 2 |
| E20202_2015 | Human | 2 |
| E20202_2017 | Human | 2 |
| E20203_2015 | Human | 2 |
| E20203_2016 | Human | 2 |
| E20203_2017 | Human | 2 |
| E20204_2015 | Human | 2 |
| E20204_2017 | Human | 2 |

|             |       |   |
|-------------|-------|---|
| E20205_2015 | Human | 2 |
| E20205_2016 | Human | 2 |
| E20206_2017 | Human | 2 |
| E20207_2017 | Human | 2 |
| E20208_2017 | Human | 2 |
| E20209_2017 | Human | 2 |
| E20210_2017 | Human | 2 |
| E20301_2015 | Human | 2 |
| E20301_2016 | Human | 2 |
| E20301_2017 | Human | 2 |
| E20302_2015 | Human | 2 |
| E20302_2016 | Human | 2 |
| E20304_2015 | Human | 2 |
| E20304_2016 | Human | 2 |
| E20304_2017 | Human | 2 |
| E20305_2015 | Human | 2 |
| E20305_2016 | Human | 2 |
| E20305_2017 | Human | 2 |
| E20306_2015 | Human | 2 |
| E20306_2016 | Human | 2 |
| E20306_2017 | Human | 2 |
| E20307_2015 | Human | 2 |
| E20307_2016 | Human | 2 |
| E20307_2017 | Human | 2 |
| E20308_2015 | Human | 2 |
| E20308_2016 | Human | 2 |
| E20308_2017 | Human | 2 |
| E20309_2015 | Human | 2 |
| E20309_2017 | Human | 2 |
| E20310_2015 | Human | 2 |
| E20311_2015 | Human | 2 |
| E20312_2015 | Human | 2 |
| E20312_2017 | Human | 2 |
| E20313_2015 | Human | 2 |
| E20313_2017 | Human | 2 |
| E20314_2015 | Human | 2 |
| E20401_2015 | Human | 2 |
| E20401_2017 | Human | 2 |
| E20402_2015 | Human | 2 |
| E20402_2017 | Human | 2 |
| E20403_2015 | Human | 2 |

|             |       |   |
|-------------|-------|---|
| E20403_2017 | Human | 2 |
| E20404_2015 | Human | 2 |
| E20404_2017 | Human | 2 |
| E20405_2015 | Human | 2 |
| E20405_2017 | Human | 2 |
| E20406_2015 | Human | 2 |
| E20406_2017 | Human | 2 |
| E20407_2015 | Human | 2 |
| E20407_2017 | Human | 2 |
| E20408_2015 | Human | 2 |
| E20408_2017 | Human | 2 |
| E20409_2015 | Human | 2 |
| E20409_2017 | Human | 2 |
| E20410_2015 | Human | 2 |
| E20410_2017 | Human | 2 |
| E20411_2015 | Human | 2 |
| E20411_2017 | Human | 2 |
| E20412_2015 | Human | 2 |
| E20412_2017 | Human | 2 |
| E20413_2015 | Human | 2 |
| E20413_2017 | Human | 2 |
| E20415_2015 | Human | 2 |
| E20415_2017 | Human | 2 |
| E20416_2015 | Human | 2 |
| E20416_2017 | Human | 2 |
| E20417_2015 | Human | 2 |
| E20417_2017 | Human | 2 |
| E20418_2015 | Human | 2 |
| E20419_2017 | Human | 2 |
| E20420_2015 | Human | 2 |
| E20420_2017 | Human | 2 |
| E20421_2015 | Human | 2 |
| E20421_2017 | Human | 2 |
| E20422_2017 | Human | 2 |
| E20601_2015 | Human | 2 |
| E20601_2016 | Human | 2 |
| E20602_2015 | Human | 2 |
| E20602_2016 | Human | 2 |
| E20602_2017 | Human | 2 |
| E20603_2015 | Human | 2 |
| E20603_2016 | Human | 2 |

|             |       |   |
|-------------|-------|---|
| E20604_2015 | Human | 2 |
| E20604_2016 | Human | 2 |
| E20605_2015 | Human | 2 |
| E20605_2017 | Human | 2 |
| E20606_2015 | Human | 2 |
| E20606_2016 | Human | 2 |
| E20606_2017 | Human | 2 |
| E20607_2015 | Human | 2 |
| E20607_2016 | Human | 2 |
| E20607_2017 | Human | 2 |
| E20608_2015 | Human | 2 |
| E20608_2016 | Human | 2 |
| E20608_2017 | Human | 2 |
| E20609_2015 | Human | 2 |
| E20609_2016 | Human | 2 |
| E20609_2017 | Human | 2 |
| E20610_2015 | Human | 2 |
| E20610_2016 | Human | 2 |
| E20610_2017 | Human | 2 |
| E20611_2015 | Human | 2 |
| E20611_2016 | Human | 2 |
| E20611_2017 | Human | 2 |
| E20612_2015 | Human | 2 |
| E20612_2017 | Human | 2 |
| E20613_2015 | Human | 2 |
| E20613_2016 | Human | 2 |
| E20613_2017 | Human | 2 |
| E20614_2016 | Human | 2 |
| E20614_2017 | Human | 2 |
| E20615_2015 | Human | 2 |
| E20615_2016 | Human | 2 |
| E20615_2017 | Human | 2 |
| E20616_2015 | Human | 2 |
| E20616_2016 | Human | 2 |
| E20616_2017 | Human | 2 |
| E20617_2015 | Human | 2 |
| E20617_2016 | Human | 2 |
| E20617_2017 | Human | 2 |
| E20618_2015 | Human | 2 |
| E20618_2016 | Human | 2 |
| E20618_2017 | Human | 2 |

|             |       |   |
|-------------|-------|---|
| E20619_2015 | Human | 2 |
| E20619_2016 | Human | 2 |
| E20619_2017 | Human | 2 |
| E20620_2015 | Human | 2 |
| E20620_2016 | Human | 2 |
| E20620_2017 | Human | 2 |
| E20621_2015 | Human | 2 |
| E20621_2016 | Human | 2 |
| E20622_2015 | Human | 2 |
| E20622_2016 | Human | 2 |
| E20622_2017 | Human | 2 |
| E20623_2015 | Human | 2 |
| E20623_2017 | Human | 2 |
| E20624_2015 | Human | 2 |
| E20624_2016 | Human | 2 |
| E20624_2017 | Human | 2 |
| E20625_2015 | Human | 2 |
| E20625_2016 | Human | 2 |
| E20625_2017 | Human | 2 |
| E20626_2015 | Human | 2 |
| E20626_2017 | Human | 2 |
| E20627_2015 | Human | 2 |
| E20627_2017 | Human | 2 |
| E20628_2015 | Human | 2 |
| E20628_2017 | Human | 2 |
| E20629_2015 | Human | 2 |
| E20801_2015 | Human | 2 |
| E20801_2016 | Human | 2 |
| E20801_2017 | Human | 2 |
| E20802_2015 | Human | 2 |
| E20802_2016 | Human | 2 |
| E20802_2017 | Human | 2 |
| E20803_2015 | Human | 2 |
| E20803_2016 | Human | 2 |
| E20803_2017 | Human | 2 |
| E20804_2016 | Human | 2 |
| E20804_2017 | Human | 2 |
| E20805_2015 | Human | 2 |
| E20805_2016 | Human | 2 |
| E20805_2017 | Human | 2 |
| E20806_2015 | Human | 2 |

|             |       |   |
|-------------|-------|---|
| E20807_2015 | Human | 2 |
| E20807_2016 | Human | 2 |
| E20808_2015 | Human | 2 |
| E20808_2016 | Human | 2 |
| E20808_2017 | Human | 2 |
| E20809_2015 | Human | 2 |
| E20809_2016 | Human | 2 |
| E20810_2015 | Human | 2 |
| E20810_2016 | Human | 2 |
| E20811_2015 | Human | 2 |
| E20811_2016 | Human | 2 |
| E20812_2015 | Human | 2 |
| E20812_2016 | Human | 2 |
| E20813_2015 | Human | 2 |
| E20813_2016 | Human | 2 |
| E20814_2015 | Human | 2 |
| E20814_2016 | Human | 2 |
| E20814_2017 | Human | 2 |
| E20815_2015 | Human | 2 |
| E20815_2016 | Human | 2 |
| E20816_2015 | Human | 2 |
| E20816_2017 | Human | 2 |
| E20817_2015 | Human | 2 |
| E20817_2016 | Human | 2 |
| E20817_2017 | Human | 2 |
| E20818_2015 | Human | 2 |
| E20818_2017 | Human | 2 |
| E20819_2015 | Human | 2 |
| E20820_2015 | Human | 2 |
| E20821_2015 | Human | 2 |
| E20821_2017 | Human | 2 |
| E20822_2016 | Human | 2 |
| E20823_2015 | Human | 2 |
| E20823_2016 | Human | 2 |
| E20824_2015 | Human | 2 |
| E20824_2016 | Human | 2 |
| E20825_2015 | Human | 2 |
| E20825_2016 | Human | 2 |
| E20825_2017 | Human | 2 |
| E20826_2016 | Human | 2 |
| E20826_2017 | Human | 2 |



|             |       |   |
|-------------|-------|---|
| E20827_2016 | Human | 2 |
| E20827_2017 | Human | 2 |
| E20828_2017 | Human | 2 |
| E20829_2016 | Human | 2 |
| E20829_2017 | Human | 2 |
| E20831_2017 | Human | 2 |
| E20832_2016 | Human | 2 |
| E20832_2017 | Human | 2 |
| E20833_2017 | Human | 2 |
| E20834_2016 | Human | 2 |
| E20834_2017 | Human | 2 |
| E20835_2016 | Human | 2 |
| E20835_2017 | Human | 2 |
| E20836_2017 | Human | 2 |
| E20837_2016 | Human | 2 |
| E20837_2017 | Human | 2 |
| E20838_2016 | Human | 2 |
| E20838_2017 | Human | 2 |
| E20839_2016 | Human | 2 |
| E20839_2017 | Human | 2 |
| E20840_2016 | Human | 2 |
| E20840_2017 | Human | 2 |
| E20841_2016 | Human | 2 |
| E20841_2017 | Human | 2 |
| E20842_2016 | Human | 2 |
| E20842_2017 | Human | 2 |
| E20843_2017 | Human | 2 |
| E20844_2016 | Human | 2 |
| E20844_2017 | Human | 2 |
| E20845_2016 | Human | 2 |
| E20845_2017 | Human | 2 |
| E20846_2016 | Human | 2 |
| E20846_2017 | Human | 2 |
| E20847_2017 | Human | 2 |
| E20848_2017 | Human | 2 |
| E20849_2017 | Human | 2 |
| E20850_2017 | Human | 2 |
| E20851_2017 | Human | 2 |
| E20852_2017 | Human | 2 |
| E20901_2015 | Human | 2 |
| E20901_2016 | Human | 2 |

|             |       |   |
|-------------|-------|---|
| E20901_2017 | Human | 2 |
| E20902_2017 | Human | 2 |
| E20903_2015 | Human | 2 |
| E20903_2016 | Human | 2 |
| E20903_2017 | Human | 2 |
| E20904_2015 | Human | 2 |
| E20904_2016 | Human | 2 |
| E20904_2017 | Human | 2 |
| E20905_2016 | Human | 2 |
| E20905_2017 | Human | 2 |
| E20906_2016 | Human | 2 |
| E20906_2017 | Human | 2 |
| E20907_2015 | Human | 2 |
| E20907_2016 | Human | 2 |
| E20908_2015 | Human | 2 |
| E20908_2017 | Human | 2 |
| E20909_2015 | Human | 2 |
| E20909_2017 | Human | 2 |
| E20911_2017 | Human | 2 |
| E20912_2017 | Human | 2 |
| E23207_2016 | Human | 2 |
| E23601_2015 | Human | 2 |
| E23601_2016 | Human | 2 |
| E23601_2017 | Human | 2 |
| E23602_2015 | Human | 2 |
| E23602_2017 | Human | 2 |
| E23603_2015 | Human | 2 |
| E23603_2016 | Human | 2 |
| E23603_2017 | Human | 2 |
| E23604_2015 | Human | 2 |
| E23604_2016 | Human | 2 |
| E23604_2017 | Human | 2 |
| E23605_2015 | Human | 2 |
| E23605_2017 | Human | 2 |
| E23606_2017 | Human | 2 |
| E23607_2015 | Human | 2 |
| E23607_2016 | Human | 2 |
| E23607_2017 | Human | 2 |
| E23608_2017 | Human | 2 |
| E23609_2017 | Human | 2 |
| E23611_2017 | Human | 2 |

|             |       |   |
|-------------|-------|---|
| E23612_2017 | Human | 2 |
| E23615_2017 | Human | 2 |
| E24001_2016 | Human | 2 |
| E24002_2016 | Human | 2 |
| E24003_2016 | Human | 2 |
| E24004_2016 | Human | 2 |
| E24005_2016 | Human | 2 |
| E24006_2016 | Human | 2 |
| E24008_2016 | Human | 2 |
| E24009_2016 | Human | 2 |
| E24010_2016 | Human | 2 |
| E24012_2016 | Human | 2 |
| E24013_2016 | Human | 2 |
| E24014_2016 | Human | 2 |
| E24015_2016 | Human | 2 |
| E24016_2016 | Human | 2 |
| E24017_2016 | Human | 2 |
| E24018_2016 | Human | 2 |
| E24019_2016 | Human | 2 |
| E24101_2017 | Human | 2 |
| E24102_2017 | Human | 2 |
| E24103_2017 | Human | 2 |
| E24104_2017 | Human | 2 |
| E24105_2017 | Human | 2 |
| E24107_2017 | Human | 2 |
| E24109_2017 | Human | 2 |
| E24110_2017 | Human | 2 |
| E31901_2015 | Human | 2 |
| E31901_2016 | Human | 2 |
| E31901_2017 | Human | 2 |
| E31902_2015 | Human | 2 |
| E31902_2016 | Human | 2 |
| E31903_2015 | Human | 2 |
| E31903_2016 | Human | 2 |
| E31903_2017 | Human | 2 |
| E31904_2015 | Human | 2 |
| E31904_2016 | Human | 2 |
| E31904_2017 | Human | 2 |
| E31905_2015 | Human | 2 |
| E31905_2016 | Human | 2 |
| E31905_2017 | Human | 2 |

|             |       |   |
|-------------|-------|---|
| E31906_2015 | Human | 2 |
| E31906_2016 | Human | 2 |
| E31906_2017 | Human | 2 |
| E31907_2015 | Human | 2 |
| E31907_2016 | Human | 2 |
| E31907_2017 | Human | 2 |
| E31908_2015 | Human | 2 |
| E31908_2016 | Human | 2 |
| E31909_2015 | Human | 2 |
| E31909_2016 | Human | 2 |
| E31910_2015 | Human | 2 |
| E31910_2017 | Human | 2 |
| E31911_2015 | Human | 2 |
| E31911_2016 | Human | 2 |
| E31912_2015 | Human | 2 |
| E31912_2016 | Human | 2 |
| E31912_2017 | Human | 2 |
| E31913_2015 | Human | 2 |
| E31913_2016 | Human | 2 |
| E31913_2017 | Human | 2 |
| E31914_2015 | Human | 2 |
| E31914_2016 | Human | 2 |
| E31914_2017 | Human | 2 |
| E31915_2015 | Human | 2 |
| E31915_2016 | Human | 2 |
| E31915_2017 | Human | 2 |
| E31916_2015 | Human | 2 |
| E31916_2016 | Human | 2 |
| E31916_2017 | Human | 2 |
| E31917_2015 | Human | 2 |
| E31917_2016 | Human | 2 |
| E31917_2017 | Human | 2 |
| E31918_2015 | Human | 2 |
| E31918_2016 | Human | 2 |
| E31918_2017 | Human | 2 |
| E31919_2015 | Human | 2 |
| E31919_2016 | Human | 2 |
| E31920_2015 | Human | 2 |
| E31920_2016 | Human | 2 |
| E31920_2017 | Human | 2 |
| E31921_2015 | Human | 2 |

|             |       |   |
|-------------|-------|---|
| E31921_2016 | Human | 2 |
| E31921_2017 | Human | 2 |
| E31922_2015 | Human | 2 |
| E31922_2016 | Human | 2 |
| E31922_2017 | Human | 2 |
| E31923_2015 | Human | 2 |
| E31923_2016 | Human | 2 |
| E31923_2017 | Human | 2 |
| E31924_2015 | Human | 2 |
| E31924_2016 | Human | 2 |
| E31924_2017 | Human | 2 |
| E31925_2015 | Human | 2 |
| E31925_2016 | Human | 2 |
| E31925_2017 | Human | 2 |
| E31926_2015 | Human | 2 |
| E31926_2016 | Human | 2 |
| E31926_2017 | Human | 2 |
| E31927_2015 | Human | 2 |
| E31927_2016 | Human | 2 |
| E31927_2017 | Human | 2 |
| E31928_2015 | Human | 2 |
| E31928_2016 | Human | 2 |
| E31928_2017 | Human | 2 |
| E31929_2015 | Human | 2 |
| E31929_2016 | Human | 2 |
| E31929_2017 | Human | 2 |
| E31930_2015 | Human | 2 |
| E31930_2016 | Human | 2 |
| E31930_2017 | Human | 2 |
| E31931_2015 | Human | 2 |
| E31932_2015 | Human | 2 |
| E31932_2017 | Human | 2 |
| E31933_2015 | Human | 2 |
| E31933_2016 | Human | 2 |
| E31933_2017 | Human | 2 |
| E31934_2016 | Human | 2 |
| E31935_2015 | Human | 2 |
| E31935_2017 | Human | 2 |
| E31936_2016 | Human | 2 |
| E31937_2015 | Human | 2 |
| E31937_2017 | Human | 2 |

|             |       |   |
|-------------|-------|---|
| E31938_2015 | Human | 2 |
| E31938_2016 | Human | 2 |
| E31939_2015 | Human | 2 |
| E31939_2017 | Human | 2 |
| E31940_2016 | Human | 2 |
| E31940_2017 | Human | 2 |
| E31941_2015 | Human | 2 |
| E31941_2016 | Human | 2 |
| E31941_2017 | Human | 2 |
| E31942_2015 | Human | 2 |
| E31942_2016 | Human | 2 |
| E31942_2017 | Human | 2 |
| E31943_2015 | Human | 2 |
| E31943_2016 | Human | 2 |
| E31944_2015 | Human | 2 |
| E31944_2016 | Human | 2 |
| E31944_2017 | Human | 2 |
| E31945_2015 | Human | 2 |
| E31945_2016 | Human | 2 |
| E31945_2017 | Human | 2 |
| E31946_2015 | Human | 2 |
| E31946_2016 | Human | 2 |
| E31946_2017 | Human | 2 |
| E31947_2015 | Human | 2 |
| E31947_2017 | Human | 2 |
| E31948_2015 | Human | 2 |
| E31948_2016 | Human | 2 |
| E31948_2017 | Human | 2 |
| E31949_2015 | Human | 2 |
| E31949_2016 | Human | 2 |
| E31949_2017 | Human | 2 |
| E31950_2015 | Human | 2 |
| E31950_2017 | Human | 2 |
| E31951_2017 | Human | 2 |
| E31952_2015 | Human | 2 |
| E31952_2017 | Human | 2 |
| E31953_2017 | Human | 2 |
| E31954_2017 | Human | 2 |
| E31955_2017 | Human | 2 |
| E31956_2017 | Human | 2 |
| E32101_2015 | Human | 2 |

|             |       |   |
|-------------|-------|---|
| E32101_2017 | Human | 2 |
| E32102_2017 | Human | 2 |
| E32103_2016 | Human | 2 |
| E32104_2017 | Human | 2 |
| E32201_2016 | Human | 2 |
| E32201_2017 | Human | 2 |
| E32202_2016 | Human | 2 |
| E32202_2017 | Human | 2 |
| E32203_2015 | Human | 2 |
| E32203_2016 | Human | 2 |
| E32204_2015 | Human | 2 |
| E32204_2016 | Human | 2 |
| E32204_2017 | Human | 2 |
| E32205_2015 | Human | 2 |
| E32205_2016 | Human | 2 |
| E32205_2017 | Human | 2 |
| E32206_2015 | Human | 2 |
| E32206_2016 | Human | 2 |
| E32207_2015 | Human | 2 |
| E32207_2016 | Human | 2 |
| E32207_2017 | Human | 2 |
| E32208_2015 | Human | 2 |
| E32208_2016 | Human | 2 |
| E32208_2017 | Human | 2 |
| E32209_2015 | Human | 2 |
| E32209_2016 | Human | 2 |
| E32209_2017 | Human | 2 |
| E32210_2015 | Human | 2 |
| E32210_2017 | Human | 2 |
| E32211_2015 | Human | 2 |
| E32211_2016 | Human | 2 |
| E32211_2017 | Human | 2 |
| E32212_2015 | Human | 2 |
| E32212_2016 | Human | 2 |
| E32213_2015 | Human | 2 |
| E32213_2017 | Human | 2 |
| E32214_2015 | Human | 2 |
| E32214_2016 | Human | 2 |
| E32214_2017 | Human | 2 |
| E32215_2017 | Human | 2 |
| E32216_2017 | Human | 2 |

|             |       |   |
|-------------|-------|---|
| E32217_2017 | Human | 2 |
| E32218_2017 | Human | 2 |
| E32219_2017 | Human | 2 |
| E32220_2017 | Human | 2 |
| E32221_2017 | Human | 2 |
| E32222_2017 | Human | 2 |
| E32223_2017 | Human | 2 |
| E32224_2017 | Human | 2 |
| E32225_2017 | Human | 2 |
| E32301_2016 | Human | 2 |
| E32301_2017 | Human | 2 |
| E32302_2015 | Human | 2 |
| E32302_2016 | Human | 2 |
| E32302_2017 | Human | 2 |
| E32303_2015 | Human | 2 |
| E32303_2016 | Human | 2 |
| E32303_2017 | Human | 2 |
| E32304_2015 | Human | 2 |
| E32304_2016 | Human | 2 |
| E32304_2017 | Human | 2 |
| E32305_2015 | Human | 2 |
| E32305_2016 | Human | 2 |
| E32306_2015 | Human | 2 |
| E32306_2016 | Human | 2 |
| E32307_2015 | Human | 2 |
| E32307_2016 | Human | 2 |
| E32308_2015 | Human | 2 |
| E32308_2016 | Human | 2 |
| E32309_2015 | Human | 2 |
| E32309_2016 | Human | 2 |
| E32309_2017 | Human | 2 |
| E32310_2015 | Human | 2 |
| E32310_2016 | Human | 2 |
| E32311_2015 | Human | 2 |
| E32311_2016 | Human | 2 |
| E32311_2017 | Human | 2 |
| E32312_2015 | Human | 2 |
| E32312_2016 | Human | 2 |
| E32312_2017 | Human | 2 |
| E32313_2015 | Human | 2 |
| E32313_2016 | Human | 2 |



|             |       |   |
|-------------|-------|---|
| E32314_2016 | Human | 2 |
| E32315_2015 | Human | 2 |
| E32315_2016 | Human | 2 |
| E32315_2017 | Human | 2 |
| E32316_2015 | Human | 2 |
| E32316_2016 | Human | 2 |
| E32316_2017 | Human | 2 |
| E32317_2015 | Human | 2 |
| E32317_2016 | Human | 2 |
| E32317_2017 | Human | 2 |
| E32318_2016 | Human | 2 |
| E32318_2017 | Human | 2 |
| E32319_2015 | Human | 2 |
| E32319_2016 | Human | 2 |
| E32319_2017 | Human | 2 |
| E32320_2016 | Human | 2 |
| E32320_2017 | Human | 2 |
| E32321_2016 | Human | 2 |
| E32321_2017 | Human | 2 |
| E32322_2015 | Human | 2 |
| E32322_2016 | Human | 2 |
| E32322_2017 | Human | 2 |
| E32323_2015 | Human | 2 |
| E32323_2017 | Human | 2 |
| E32324_2015 | Human | 2 |
| E32324_2016 | Human | 2 |
| E32325_2015 | Human | 2 |
| E32325_2016 | Human | 2 |
| E32326_2015 | Human | 2 |
| E32326_2016 | Human | 2 |
| E32327_2015 | Human | 2 |
| E32328_2015 | Human | 2 |
| E32329_2015 | Human | 2 |
| E33101_2015 | Human | 2 |
| E33101_2016 | Human | 2 |
| E33101_2017 | Human | 2 |
| E33102_2015 | Human | 2 |
| E33102_2016 | Human | 2 |
| E33102_2017 | Human | 2 |
| E33103_2016 | Human | 2 |
| E33103_2017 | Human | 2 |

|             |       |   |
|-------------|-------|---|
| E33104_2015 | Human | 2 |
| E33104_2016 | Human | 2 |
| E33104_2017 | Human | 2 |
| E33105_2015 | Human | 2 |
| E33105_2016 | Human | 2 |
| E33106_2015 | Human | 2 |
| E33106_2016 | Human | 2 |
| E33106_2017 | Human | 2 |
| E33107_2015 | Human | 2 |
| E33107_2016 | Human | 2 |
| E33107_2017 | Human | 2 |
| E33108_2016 | Human | 2 |
| E33108_2017 | Human | 2 |
| E33109_2015 | Human | 2 |
| E33109_2016 | Human | 2 |
| E33109_2017 | Human | 2 |
| E33110_2015 | Human | 2 |
| E33110_2016 | Human | 2 |
| E33110_2017 | Human | 2 |
| E33111_2015 | Human | 2 |
| E33111_2016 | Human | 2 |
| E33111_2017 | Human | 2 |
| E33112_2015 | Human | 2 |
| E33112_2016 | Human | 2 |
| E33112_2017 | Human | 2 |
| E33113_2015 | Human | 2 |
| E33113_2016 | Human | 2 |
| E33113_2017 | Human | 2 |
| E33114_2015 | Human | 2 |
| E33114_2016 | Human | 2 |
| E33114_2017 | Human | 2 |
| E33115_2015 | Human | 2 |
| E33115_2016 | Human | 2 |
| E33115_2017 | Human | 2 |
| E33116_2015 | Human | 2 |
| E33116_2017 | Human | 2 |
| E33117_2015 | Human | 2 |
| E33117_2016 | Human | 2 |
| E33117_2017 | Human | 2 |
| E33118_2015 | Human | 2 |
| E33118_2017 | Human | 2 |

|             |       |   |
|-------------|-------|---|
| E33119_2015 | Human | 2 |
| E33119_2016 | Human | 2 |
| E33119_2017 | Human | 2 |
| E33120_2015 | Human | 2 |
| E33121_2015 | Human | 2 |
| E33122_2015 | Human | 2 |
| E33122_2017 | Human | 2 |
| E33124_2015 | Human | 2 |
| E33124_2017 | Human | 2 |
| E33125_2017 | Human | 2 |
| E41101_2015 | Human | 2 |
| E41101_2016 | Human | 2 |
| E41102_2016 | Human | 2 |
| E41102_2017 | Human | 2 |
| E41103_2016 | Human | 2 |
| E41103_2017 | Human | 2 |
| E41104_2015 | Human | 2 |
| E41104_2017 | Human | 2 |
| E41105_2015 | Human | 2 |
| E41105_2017 | Human | 2 |
| E41106_2015 | Human | 2 |
| E41106_2017 | Human | 2 |
| E41107_2017 | Human | 2 |
| E41108_2017 | Human | 2 |
| E41109_2015 | Human | 2 |
| E41110_2015 | Human | 2 |
| E41201_2015 | Human | 2 |
| E41201_2016 | Human | 2 |
| E41201_2017 | Human | 2 |
| E41202_2015 | Human | 2 |
| E41202_2016 | Human | 2 |
| E41202_2017 | Human | 2 |
| E41203_2015 | Human | 2 |
| E41203_2017 | Human | 2 |
| E41204_2015 | Human | 2 |
| E41204_2016 | Human | 2 |
| E41205_2015 | Human | 2 |
| E41205_2016 | Human | 2 |
| E41206_2015 | Human | 2 |
| E41206_2016 | Human | 2 |
| E41206_2017 | Human | 2 |

|             |       |   |
|-------------|-------|---|
| E41207_2015 | Human | 2 |
| E41207_2016 | Human | 2 |
| E41207_2017 | Human | 2 |
| E41208_2015 | Human | 2 |
| E41208_2016 | Human | 2 |
| E41208_2017 | Human | 2 |
| E41209_2015 | Human | 2 |
| E41209_2016 | Human | 2 |
| E41209_2017 | Human | 2 |
| E41210_2015 | Human | 2 |
| E41210_2016 | Human | 2 |
| E41211_2015 | Human | 2 |
| E41211_2017 | Human | 2 |
| E41212_2015 | Human | 2 |
| E41213_2015 | Human | 2 |
| E41213_2017 | Human | 2 |
| E41214_2015 | Human | 2 |
| E41214_2017 | Human | 2 |
| E41215_2015 | Human | 2 |
| E41216_2015 | Human | 2 |
| E41301_2016 | Human | 2 |
| E41302_2015 | Human | 2 |
| E41302_2016 | Human | 2 |
| E41302_2017 | Human | 2 |
| E41303_2015 | Human | 2 |
| E41303_2016 | Human | 2 |
| E41303_2017 | Human | 2 |
| E41304_2016 | Human | 2 |
| E41304_2017 | Human | 2 |
| E41305_2017 | Human | 2 |
| E42801_2017 | Human | 2 |
| E42802_2017 | Human | 2 |
| E42803_2017 | Human | 2 |
| E42804_2017 | Human | 2 |
| E42805_2017 | Human | 2 |
| E42806_2017 | Human | 2 |
| E42901_2015 | Human | 2 |
| E42901_2016 | Human | 2 |
| E42901_2017 | Human | 2 |
| E42902_2016 | Human | 2 |
| E43001_2015 | Human | 2 |

|             |       |   |
|-------------|-------|---|
| E43001_2016 | Human | 2 |
| E43001_2017 | Human | 2 |
| E43002_2015 | Human | 2 |
| E43002_2016 | Human | 2 |
| E43003_2015 | Human | 2 |
| E43003_2016 | Human | 2 |
| E43004_2015 | Human | 2 |
| E43004_2016 | Human | 2 |
| E43004_2017 | Human | 2 |
| E43005_2017 | Human | 2 |
| E43006_2017 | Human | 2 |
| E43008_2017 | Human | 2 |
| E51001_2015 | Human | 2 |
| E51001_2016 | Human | 2 |
| E51001_2017 | Human | 2 |
| E51002_2015 | Human | 2 |
| E51002_2016 | Human | 2 |
| E51002_2017 | Human | 2 |
| E51003_2015 | Human | 2 |
| E51003_2016 | Human | 2 |
| E51004_2015 | Human | 2 |
| E51004_2016 | Human | 2 |
| E51005_2015 | Human | 2 |
| E51006_2015 | Human | 2 |
| E51401_2016 | Human | 2 |
| E51402_2015 | Human | 2 |
| E51402_2016 | Human | 2 |
| E51403_2015 | Human | 2 |
| E51403_2016 | Human | 2 |
| E51404_2016 | Human | 2 |
| E51404_2017 | Human | 2 |
| E51405_2016 | Human | 2 |
| E51406_2015 | Human | 2 |
| E51406_2017 | Human | 2 |
| E51407_2015 | Human | 2 |
| E51407_2017 | Human | 2 |
| E51408_2016 | Human | 2 |
| E51408_2017 | Human | 2 |
| E51409_2015 | Human | 2 |
| E51409_2016 | Human | 2 |
| E51410_2017 | Human | 2 |

|             |       |   |
|-------------|-------|---|
| E51411_2015 | Human | 2 |
| E51412_2015 | Human | 2 |
| E51413_2017 | Human | 2 |
| E51414_2015 | Human | 2 |
| E51415_2015 | Human | 2 |
| E51416_2015 | Human | 2 |
| E51417_2015 | Human | 2 |
| E51418_2015 | Human | 2 |
| E51419_2015 | Human | 2 |
| E51420_2015 | Human | 2 |
| E51501_2015 | Human | 2 |
| E51501_2016 | Human | 2 |
| E51501_2017 | Human | 2 |
| E51502_2016 | Human | 2 |
| E51503_2016 | Human | 2 |
| E51503_2017 | Human | 2 |
| E51504_2015 | Human | 2 |
| E51504_2017 | Human | 2 |
| E51505_2015 | Human | 2 |
| E51505_2016 | Human | 2 |
| E51506_2015 | Human | 2 |
| E51506_2016 | Human | 2 |
| E51507_2016 | Human | 2 |
| E51507_2017 | Human | 2 |
| E51508_2015 | Human | 2 |
| E51509_2015 | Human | 2 |
| E51509_2016 | Human | 2 |
| E51510_2016 | Human | 2 |
| E51511_2016 | Human | 2 |
| E51512_2015 | Human | 2 |
| E51512_2016 | Human | 2 |
| E51512_2017 | Human | 2 |
| E51513_2015 | Human | 2 |
| E51513_2017 | Human | 2 |
| E51514_2015 | Human | 2 |
| E51514_2016 | Human | 2 |
| E51514_2017 | Human | 2 |
| E51515_2015 | Human | 2 |
| E51515_2016 | Human | 2 |
| E51516_2015 | Human | 2 |
| E51516_2017 | Human | 2 |

|             |       |   |
|-------------|-------|---|
| E51517_2015 | Human | 2 |
| E51517_2016 | Human | 2 |
| E51518_2016 | Human | 2 |
| E51519_2015 | Human | 2 |
| E51519_2016 | Human | 2 |
| E51520_2015 | Human | 2 |
| E51521_2016 | Human | 2 |
| E51522_2015 | Human | 2 |
| E51523_2015 | Human | 2 |
| E51523_2016 | Human | 2 |
| E51524_2015 | Human | 2 |
| E51524_2016 | Human | 2 |
| E51529_2016 | Human | 2 |
| E51530_2016 | Human | 2 |
| E51532_2016 | Human | 2 |
| E51533_2016 | Human | 2 |
| E51534_2016 | Human | 2 |
| E51535_2016 | Human | 2 |
| E51601_2015 | Human | 2 |
| E53501_2015 | Human | 2 |
| E53501_2017 | Human | 2 |
| E53502_2015 | Human | 2 |
| E53502_2017 | Human | 2 |
| E62501_2015 | Human | 2 |
| E62501_2016 | Human | 2 |
| E62501_2017 | Human | 2 |
| E62502_2016 | Human | 2 |
| E62502_2017 | Human | 2 |
| E62503_2015 | Human | 2 |
| E62503_2016 | Human | 2 |
| E62503_2017 | Human | 2 |
| E62504_2015 | Human | 2 |
| E62504_2016 | Human | 2 |
| E62504_2017 | Human | 2 |
| E62505_2016 | Human | 2 |
| E62505_2017 | Human | 2 |
| E62506_2015 | Human | 2 |
| E62506_2016 | Human | 2 |
| E62507_2015 | Human | 2 |
| E62507_2016 | Human | 2 |
| E62507_2017 | Human | 2 |

|             |       |   |
|-------------|-------|---|
| E62508_2015 | Human | 2 |
| E62508_2017 | Human | 2 |
| E62509_2015 | Human | 2 |
| E62509_2017 | Human | 2 |
| E62510_2015 | Human | 2 |
| E62510_2016 | Human | 2 |
| E62510_2017 | Human | 2 |
| E62511_2015 | Human | 2 |
| E62511_2016 | Human | 2 |
| E62512_2015 | Human | 2 |
| E62512_2016 | Human | 2 |
| E62512_2017 | Human | 2 |
| E62513_2015 | Human | 2 |
| E62514_2016 | Human | 2 |
| E62514_2017 | Human | 2 |
| E62515_2016 | Human | 2 |
| E62515_2017 | Human | 2 |
| E62516_2016 | Human | 2 |
| E62516_2017 | Human | 2 |
| E62517_2017 | Human | 2 |
| E62518_2017 | Human | 2 |
| E62519_2017 | Human | 2 |
| E62520_2017 | Human | 2 |
| E62601_2015 | Human | 2 |
| E62601_2016 | Human | 2 |
| E62601_2017 | Human | 2 |
| E62602_2015 | Human | 2 |
| E62602_2016 | Human | 2 |
| E62602_2017 | Human | 2 |
| E62603_2015 | Human | 2 |
| E62603_2016 | Human | 2 |
| E62604_2015 | Human | 2 |
| E62604_2016 | Human | 2 |
| E62604_2017 | Human | 2 |
| E62605_2015 | Human | 2 |
| E62605_2016 | Human | 2 |
| E62605_2017 | Human | 2 |
| E62606_2016 | Human | 2 |
| E62606_2017 | Human | 2 |
| E62607_2016 | Human | 2 |
| E62607_2017 | Human | 2 |



|             |       |   |
|-------------|-------|---|
| E62608_2015 | Human | 2 |
| E62608_2016 | Human | 2 |
| E62609_2015 | Human | 2 |
| E62609_2016 | Human | 2 |
| E62611_2015 | Human | 2 |
| E62612_2015 | Human | 2 |
| E62613_2015 | Human | 2 |
| E62613_2016 | Human | 2 |
| E62614_2015 | Human | 2 |
| E62614_2016 | Human | 2 |
| E62615_2015 | Human | 2 |
| E62615_2016 | Human | 2 |
| E62616_2016 | Human | 2 |
| E62617_2016 | Human | 2 |
| E62701_2015 | Human | 2 |
| E62701_2017 | Human | 2 |
| E62702_2015 | Human | 2 |
| E62702_2017 | Human | 2 |
| E63301_2017 | Human | 2 |
| E63302_2016 | Human | 2 |
| E63302_2017 | Human | 2 |
| E63401_2016 | Human | 2 |
| E63401_2017 | Human | 2 |
| E63402_2015 | Human | 2 |
| E63402_2017 | Human | 2 |
| E63403_2015 | Human | 2 |
| E63404_2015 | Human | 2 |
| E63404_2017 | Human | 2 |
| E63405_2015 | Human | 2 |
| E63701_2015 | Human | 2 |
| E63701_2016 | Human | 2 |
| E63701_2017 | Human | 2 |
| E63702_2016 | Human | 2 |
| E63702_2017 | Human | 2 |
| E63703_2015 | Human | 2 |
| E63703_2016 | Human | 2 |
| E63703_2017 | Human | 2 |
| E63704_2015 | Human | 2 |
| E63704_2016 | Human | 2 |
| E63705_2015 | Human | 2 |
| E63705_2016 | Human | 2 |

|             |       |   |
|-------------|-------|---|
| E63705_2017 | Human | 2 |
| E63706_2015 | Human | 2 |
| E63706_2017 | Human | 2 |
| E63707_2016 | Human | 2 |
| E63707_2017 | Human | 2 |
| E63708_2015 | Human | 2 |
| E63708_2016 | Human | 2 |
| E63708_2017 | Human | 2 |
| E63709_2015 | Human | 2 |
| E63709_2016 | Human | 2 |
| E63710_2015 | Human | 2 |
| E63710_2016 | Human | 2 |
| E63711_2015 | Human | 2 |
| E63711_2016 | Human | 2 |
| E63711_2017 | Human | 2 |
| E63712_2015 | Human | 2 |
| E63712_2016 | Human | 2 |
| E63712_2017 | Human | 2 |
| E63713_2015 | Human | 2 |
| E63713_2017 | Human | 2 |
| E63714_2015 | Human | 2 |
| E63714_2016 | Human | 2 |
| E63714_2017 | Human | 2 |
| E63715_2015 | Human | 2 |
| E63715_2016 | Human | 2 |
| E63715_2017 | Human | 2 |
| E63716_2015 | Human | 2 |
| E63716_2016 | Human | 2 |
| E63716_2017 | Human | 2 |
| E63717_2015 | Human | 2 |
| E63717_2017 | Human | 2 |
| E63718_2017 | Human | 2 |
| E63719_2017 | Human | 2 |
| E63720_2017 | Human | 2 |
| E63721_2017 | Human | 2 |
| E63722_2017 | Human | 2 |
| E63723_2017 | Human | 2 |
| E63724_2017 | Human | 2 |
| E63725_2017 | Human | 2 |
| E64001_2017 | Human | 2 |
| E64002_2017 | Human | 2 |

|             |       |            |
|-------------|-------|------------|
| E71801_2015 | Human | 2          |
| E71801_2016 | Human | 2          |
| E71801_2017 | Human | 2          |
| E71802_2015 | Human | 2          |
| E71802_2016 | Human | 2          |
| E71802_2017 | Human | 2          |
| E71803_2016 | Human | 2          |
| E71803_2017 | Human | 2          |
| E71804_2015 | Human | 2          |
| E71806_2015 | Human | 2          |
| E71806_2017 | Human | 2          |
| E71807_2017 | Human | 2          |
| E71809_2015 | Human | 2          |
| E71810_2015 | Human | 2          |
| E73201_2016 | Human | 2          |
| E73201_2017 | Human | 2          |
| E73202_2016 | Human | 2          |
| E73203_2016 | Human | 2          |
| E73204_2016 | Human | 2          |
| E73204_2017 | Human | 2          |
| E73205_2016 | Human | 2          |
| E73205_2017 | Human | 2          |
| E73206_2016 | Human | 2          |
| E73206_2017 | Human | 2          |
| E73207_2017 | Human | 2          |
| E73208_2016 | Human | 2          |
| E73208_2017 | Human | 2          |
| E73209_2016 | Human | 2          |
| E73209_2017 | Pig   | This study |
| E73210_2017 | Pig   | This study |
| EN001       | Pig   | This study |
| EN003       | Pig   | This study |
| EN004       | Pig   | This study |
| EN005       | Pig   | This study |
| EN006       | Pig   | This study |
| EN007       | Pig   | This study |
| EN008       | Pig   | This study |
| EN010       | Pig   | This study |
| EN017       | Pig   | This study |
| EN020       | Pig   | This study |
| EN026       | Pig   | This study |

|       |     |            |
|-------|-----|------------|
| EN032 | Pig | This study |
| EN033 | Pig | This study |
| EN034 | Pig | This study |
| EN035 | Pig | This study |
| EN037 | Pig | This study |
| EN038 | Pig | This study |
| EN039 | Pig | This study |
| EN043 | Pig | This study |
| EN045 | Pig | This study |
| EN050 | Pig | This study |
| EN051 | Pig | This study |
| EN053 | Pig | This study |
| EN054 | Pig | This study |
| EN056 | Pig | This study |
| EN058 | Pig | This study |
| EN059 | Pig | This study |
| EN073 | Pig | This study |
| EN075 | Pig | This study |
| EN077 | Pig | This study |
| EN079 | Pig | This study |
| EN080 | Pig | This study |
| EN081 | Pig | This study |
| EN082 | Pig | This study |
| EN083 | Pig | This study |
| EN084 | Pig | This study |
| EN085 | Pig | This study |
| EN086 | Pig | This study |
| EN089 | Pig | This study |
| EN102 | Pig | This study |
| EN105 | Pig | This study |
| EN107 | Pig | This study |
| EN110 | Pig | This study |
| EN111 | Pig | This study |
| EN113 | Pig | This study |
| EN117 | Pig | This study |
| EN118 | Pig | This study |
| EN122 | Pig | This study |
| EN123 | Pig | This study |
| EN124 | Pig | This study |
| EN125 | Pig | This study |
| EN127 | Pig | This study |

|       |     |            |
|-------|-----|------------|
| EN128 | Pig | This study |
| EN132 | Pig | This study |
| EN134 | Pig | This study |
| EN135 | Pig | This study |
| EN138 | Pig | This study |
| EN145 | Pig | This study |
| EN155 | Pig | This study |
| EN164 | Pig | This study |
| EN166 | Pig | This study |
| EN168 | Pig | This study |
| EN173 | Pig | This study |
| EN185 | Pig | This study |
| EN186 | Pig | This study |
| EN187 | Pig | This study |
| EN188 | Pig | This study |
| EN189 | Pig | This study |
| EN191 | Pig | This study |
| EN199 | Pig | This study |
| EN200 | Pig | This study |

Study 1 : O’Dea M, et al. Genomic, Antimicrobial Resistance, and Public Health Insights into spp. from Australian Chickens. Journal of Clinical Microbiology.

Study 2 : Lee T, et al. 2020. A three-year whole genome sequencing perspective of *Enterococcus faecium* sepsis in Australia. PLOS ONE.
